# Supplementary material for: Risk Factors for Hepatitis C Virus Reinfection After Sustained Virologic Response in Patients Coinfected With HIV
Source: PubMed Central journal article supplement — Clin Infect Dis. 2017 Feb 12;64(9):1154–62. doi: 10.1093/cid/cix126 (PMC5399935; doi:10.1093/cid/cix126), 2017-02-12

**Risk factors for hepatitis C virus reinfection after sustained virologic response  
in patients co-infected with HIV**

Jim Young<sup>1,2</sup>, Carmine Rossi<sup>1</sup>, John Gill<sup>3</sup>, Sharon Walmsley<sup>4,5</sup>, Curtis Cooper<sup>5,6</sup>, Joseph Cox<sup>1</sup>,  
Valerie Martel-Laferrriere<sup>7</sup>, Brian Conway<sup>8</sup>, Neora Pick<sup>9</sup>, Marie-Louise Vachon<sup>10</sup>, Marina B. Klein<sup>1,5</sup>

for the Canadian Co-infection Cohort Investigators

<sup>1</sup> Department of Medicine, Division of Infectious Diseases, McGill University Health Centre,  
Montreal, Canada

<sup>2</sup> Basel Institute for Clinical Epidemiology and Biostatistics, University Hospital Basel, Basel,  
Switzerland

<sup>3</sup> Southern Alberta HIV Clinic, Calgary, Canada

<sup>4</sup> University Health Network, University of Toronto, Toronto, Canada

<sup>5</sup> CIHR Canadian HIV Trials Network, Vancouver, Canada

<sup>6</sup> Department of Medicine, University of Ottawa, Ottawa, Canada.

<sup>7</sup> Department of Microbiology and Infectious Diseases, Centre de Recherche du Centre Hospitalier  
de l'Université de Montréal, Montréal, Canada

<sup>8</sup> Vancouver Infectious Diseases Centre, Vancouver, Canada.

<sup>9</sup> Division of Infectious Diseases, Oak Tree Clinic, BC Women's Hospital, Vancouver, Canada.

<sup>10</sup> Division of Infectious Diseases, Laval University, Québec City, Canada.

**Corresponding author:**

Marina B. Klein

Department of Medicine, Division of Infectious Diseases,

McGill University Health Centre,

1001 Decarie Boulevard, D02.4110

Montreal, Quebec H4A 3J1, Canada

Email: marina.klein@mcgill.ca

Telephone: 1-514-843-2090

Fax: 1-514-843-2092

**Supplementary Material – Table of Contents**

|                                                                                                                           |        |
|---------------------------------------------------------------------------------------------------------------------------|--------|
| <b>Table 1.</b> Self-reported use of injection drugs at sustained virologic response and at the end of follow-up.         | page 3 |
| <b>Table 2.</b> Posterior hazard ratios for risk factors of reinfection under weakly informative or uninformative priors. | page 4 |
| <b>Table 3.</b> Characteristics of patients censored without reinfection at their last visit prior to censoring.          | page 5 |
| <b>Table 4.</b> Observed and estimated reinfection rates over time.                                                       | page 6 |
| <b>Figure 1.</b> Rates of reinfection over time in the main analysis and in the second sensitivity analysis.              | page 7 |

**Supplementary Table 1.**

Self-reported use of injection drugs at sustained virologic response and at the end of follow-up.

**Note:** The categories are not mutually exclusive. For example, a crack/cocaine user may have reported using heroin at the same visit.

| Injection drug               | At sustained<br>virologic response<br><br>(n=257) | At visit prior to<br>re-infection<br><br>(n=18) | At visit prior to<br>censoring<br>(without reinfection)<br><br>(n=239) |
|------------------------------|---------------------------------------------------|-------------------------------------------------|------------------------------------------------------------------------|
| Crack/cocaine                | 24 (9%)                                           | 7 (39%)                                         | 24 (10%)                                                               |
| Methamphetamines             | 4 (2%)                                            | 1 (6%)                                          | 5 (2%)                                                                 |
| Any opiate, including heroin | 14 (5%)                                           | 5 (28%)                                         | 11 (5%)                                                                |
| Heroin                       | 10 (4%)                                           | 5 (28%)                                         | 9 (4%)                                                                 |
| Other, besides heroin        | 7 (3%)                                            | 0 (0%)                                          | 6 (3%)                                                                 |
| All other illicit drugs      | 2 (1%)                                            | 0 (0%)                                          | 1 (< 1%)                                                               |

**Supplementary Table 2.**

Posterior hazard ratios for risk factors of reinfection under weakly informative or uninformative priors.

**Note:** Weakly informative prior distributions were used in the main analysis. These distributions are shown in Table 3. The uninformative prior distributions were all flat log normal distributions with mean zero and variance 100. Using weakly informative priors restricts posterior estimates to a more plausible range – for example, interval estimates for high and low frequency injection drug use (IDU) and aboriginal ethnicity – ruling out values that a knowledgeable clinician would not find credible.

| Risk factor (n=257)                                                  | Posterior hazard ratios (95% CrI) given: |                                   |
|----------------------------------------------------------------------|------------------------------------------|-----------------------------------|
|                                                                      | Weakly informative prior distributions   | Uninformative prior distributions |
| MSM (versus heterosexual male) <sup>1</sup>                          | 1.7 (0.62–3.4)                           | 1.3 (0.24–3.9)                    |
| High risk sexual behavior in MSM <sup>1,2</sup>                      | 1.8 (0.56–4.4)                           | 2.8 (0.27–11)                     |
| Low frequency IDU <sup>1,3</sup>                                     | 2.3 (0.53–6.3)                           | 4.6 (0.10–19)                     |
| High frequency IDU <sup>1,4</sup>                                    | 6.1 (2.5–12)                             | 8.8 (2.8–21)                      |
| Shared IDU equipment <sup>1,5</sup>                                  | 2.0 (0.44–5.6)                           | 0.31 (0.00–2.8)                   |
| Female (versus heterosexual male)                                    | 1.0 (0.32–2.5)                           | 0.69 (0.06–2.4)                   |
| Aboriginal ethnicity                                                 | 1.6 (0.42–4.1)                           | 2.6 (0.06–8.9)                    |
| Age at SVR (per 10 year increase)                                    | 0.90 (0.48–1.5)                          | 0.92 (0.48–1.6)                   |
| Latest CD4 <sup>+</sup> cell count (per 100 cells/ $\mu$ L increase) | 0.82 (0.62–1.0)                          | 0.81 (0.62–1.0)                   |

SVR, sustained virologic response; CrI, credible interval; MSM, men who have sex with men; IDU, injection drug use.

<sup>1</sup> Patient report of behaviour in the previous six months.

<sup>2</sup> Patient reports more than one male sexual partner and less than perfect condom use.

<sup>3</sup> Patient reports injecting drugs other than cocaine or methamphetamines (mainly opiates).

<sup>4</sup> Patient reports injecting cocaine or methamphetamines.

<sup>5</sup> Patient reports shared use of needles or of other paraphernalia, such as containers and spoons.

**Supplementary Table 3.**

Characteristics of patients censored without reinfection at their last visit prior to censoring.

| <b>Characteristic at last visit<br/>prior to censoring</b> | <b>Administrative<br/>censoring<br/>(n=183)</b> | <b>No visit<br/>in the last year<sup>1</sup><br/>(n=45)</b> | <b>Died<br/>(n=11)</b> |
|------------------------------------------------------------|-------------------------------------------------|-------------------------------------------------------------|------------------------|
| Age in years, median (IQR)                                 | 51 (46, 56)                                     | 45 (40, 51)                                                 | 55 (44, 64)            |
| Male sex, %                                                | 80                                              | 87                                                          | 100                    |
| Aboriginal ethnicity, %                                    | 7                                               | 11                                                          | 0                      |
| Ever IDU, %                                                | 75                                              | 71                                                          | 73                     |
| Type of recent IDU, % <sup>2,3</sup>                       |                                                 |                                                             |                        |
| No recent IDU                                              | 88                                              | 82                                                          | 64                     |
| Low frequency                                              | 3                                               | 0                                                           | 9                      |
| High frequency                                             | 9                                               | 18                                                          | 27                     |
| Recent MSM activity (among<br>males only), % <sup>2</sup>  | 28                                              | 38                                                          | 18                     |
| Recent condom use, % <sup>2</sup>                          |                                                 |                                                             |                        |
| Not sexually active                                        | 47                                              | 41                                                          | 70                     |
| Always                                                     | 28                                              | 30                                                          | 10                     |
| Sometimes or never                                         | 25                                              | 29                                                          | 20                     |
| Time since HIV diagnosis in<br>years, median (IQR)         | 19 (13, 25)                                     | 13 (8, 19)                                                  | 17 (13, 20)            |
| CD4 cell count in cells/ $\mu$ L,<br>median (IQR)          | 560 (420, 780)                                  | 490 (360, 650)                                              | 560 (320, 730)         |
| HIV viral load >50<br>copies/mL, %                         | 8                                               | 5                                                           | 22                     |
| On antiretroviral therapy, %                               | 95                                              | 98                                                          | 91                     |

IQR, inter-quartile range; IDU, injection drug use; MSM, men who have sex with men.

<sup>1</sup> Loss to follow-up: no study visits after July 2015, one year before the end of the study.

<sup>2</sup> Patient reported behaviour for the previous six months.

<sup>3</sup> High frequency: patient reported injecting cocaine or methamphetamines.

Low frequency: patient reported injecting some other drug.

**Supplementary Table 4.**

Observed and estimated reinfection rates over time.

**Note:** Estimated reinfection rates are lower in reference patients because risk factors are absent.

|                                                             | Within the first year | 1 to 3 years | Beyond three years |
|-------------------------------------------------------------|-----------------------|--------------|--------------------|
| <b>Observed</b>                                             |                       |              |                    |
| Patients at the start of the period                         | 257                   | 146          | 63                 |
| Reinfections during the period                              | 4                     | 9            | 5                  |
| Cumulative risk <sup>1</sup>                                | 0.02                  | 0.08         | 0.15               |
| Person-years of follow-up                                   | 219                   | 214          | 156                |
| Rate per 1000 PYFU                                          | 18                    | 42           | 32                 |
| <b>Estimated rate per 1000 PYFU (95% credible interval)</b> |                       |              |                    |
| Unadjusted with an uninformative prior <sup>2</sup>         | 19 (5 – 40)           | 42 (19 – 73) | 32 (11 – 65)       |
| In reference patients and with:                             |                       |              |                    |
| uninformative priors <sup>3</sup>                           | 10 (2 – 26)           | 24 (6 – 56)  | 26 (6 – 62)        |
| weakly informative priors <sup>4</sup>                      | 10 (2 – 20)           | 22 (8 – 44)  | 20 (6 – 46)        |
| in the main analysis <sup>5</sup>                           | 10 (4 – 20)           | 20 (8 – 38)  | 18 (8 – 36)        |

PYFU, person-years of follow-up.

<sup>1</sup> One minus the probability of reinfection-free survival calculated using the Kaplan-Meier method.

<sup>2</sup> A flat prior for the reinfection rate – a log normal distribution with mean zero and variance 100.

<sup>3</sup> Flat priors for all covariates and for the reinfection rate.

<sup>4</sup> Weakly informative priors for all covariates and for the reinfection rate (first sensitivity analysis).

<sup>5</sup> Weakly informative priors for all covariates and an informative prior for the reinfection rate.

**Supplementary Figure 1.**

Rates of reinfection over time in the main analysis and in the second sensitivity analysis.

**Note:** RNA measurements were missing when either the patient did not attend a scheduled visit or the patient attended a scheduled visit but a measurement was not made. In many cases, patients then tested negative at a subsequent visit, so it was safe to assume the patient was not reinfected at the time of the missing measurement. There were seven patients who had a missing measurement followed by a positive test when a next measurement was made. For these seven patients, we went back to site investigators to ask whether there was other information that would allow us to determine when re-infection occurred (such as ALT and AST values). This process left only three patients where we were uncertain about the date when re-infection would have been seen at a scheduled visit.

This figure shows estimated Hepatitis C reinfection rates and 95% credible intervals per 1000 person years in the first year, one to three years and more than three years after a sustained virologic response (n=257). The top panel shows results of the main analysis – for three patients, reinfection was assumed to have been first detectable only when it was first measured after a sequence of missed visits. The bottom panel shows results for the second sensitivity analysis – for those three patients, reinfection was assumed to have first detectable at the first missed visit in their sequence of missed visits (three, six and nine months earlier respectively).

Comparing these two sets of estimates suggests that the rate of reinfection was lower in the first year than in later years (see also Supplementary Table 4) regardless of when reinfection was assumed to have occurred for these three patients.

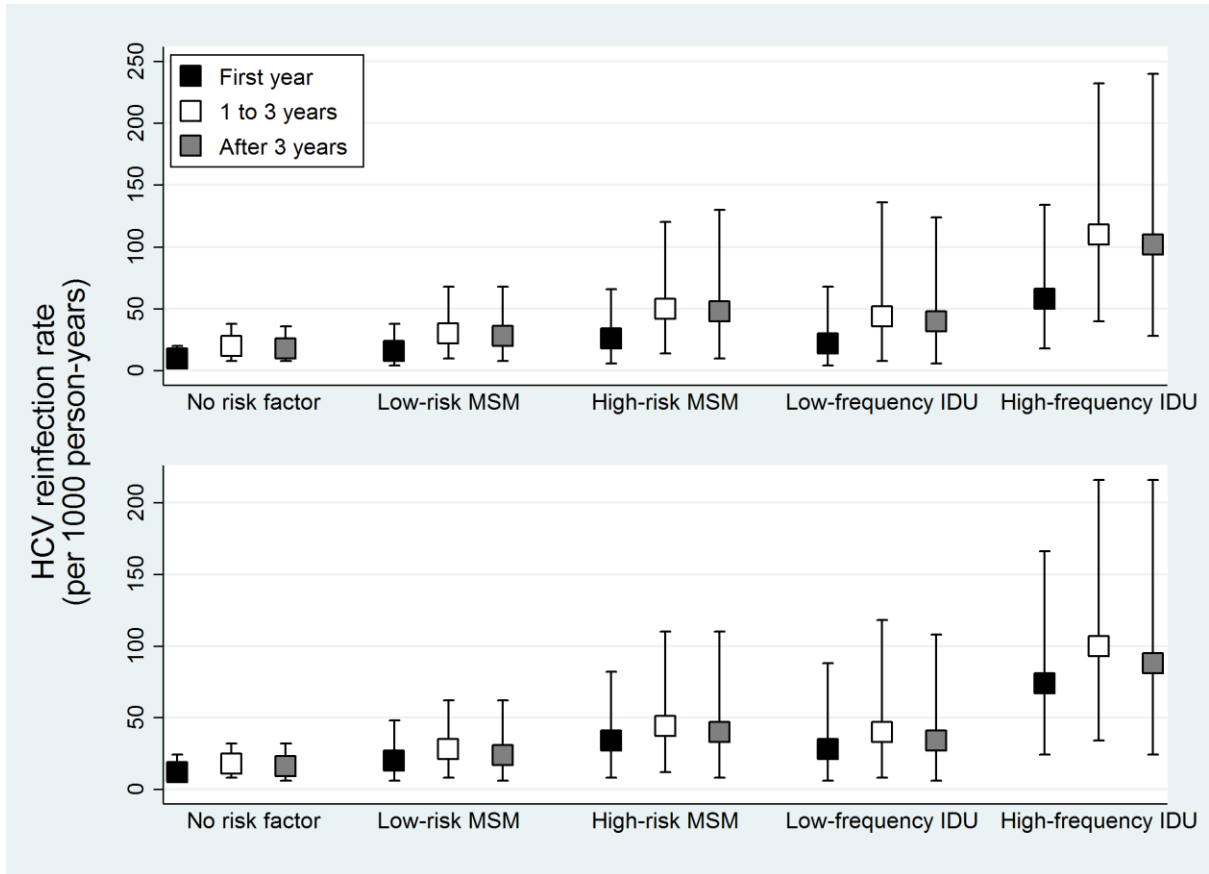

Supplement: cix126_suppl_HCVRe_InfectionSupplementaryMaterial_CID_2017_03_08_Proofs.pdf [file cix126_suppl_HCVRe_InfectionSupplementaryMaterial_CID_2017_03_08_Proofs.pdf]
